# Supplementary material for: Molecular Tracking of The Origin of Vesicular Stomatitis Outbreaks in 2004 and 2018, Ecuador
Source: Preprints.org preprint supplement (doi:10.20944/preprints202301.0052.v1), 2023-01-04
Supplement: Supplementary file 1 [file Suplementary Table S3[1934].docx]

Suplementary Table S3. Haplotypes, and sample origin.

| **Country** | **State/Province** | **Haplotype** |
| --- | --- | --- |
| Colombia |  | Hap_1, Hap_2, Hap_3, Hap_4 |
| Costa Rica |  | Hap_5 |
| Ecuador | Carchi | Hap_30 |
| Cotopaxi | Hap_6, Hap_30 |
| Esmeraldas | Hap_32 |
| Guayas | Hap_6, Hap_29 |
| Imbabura | Hap_30, Hap_33, Hap_34, Hap_36 |
| Los Rios | Hap_6, Hap_8, Hap_30 |
| Morona Santiago | Hap_35 |
| Napo | Hap_7, Hap_28, Hap_30 |
| Orellana | Hap_9, Hap_28, Hap_38 |
| Pastaza | Hap_28 |
| Pichincha | Hap_4, Hap_6, Hap_30 |
| Santo Domingo de los Tsachilas | Hap_30, Hap_31, Hap_37 |
| Sucumbios | Hap_27 |
| Zamora Chinchipe | Hap_28 |
| Guatemala |  | Hap_20 |
| Honduras |  | Hap_11, Hap_22, Hap_25, Hap_26 |
| Mexico | Chiapas | Hap_24 |
| Colima | Hap_10 |
| Guerrero | Hap_17 |
| Jalisto | Hap_19 |
| Michoacan | Hap_19 |
| Oaxaca | Hap_21 |
| Tabasco | Hap_21 |
| Veracruz | Hap_15 |
| Nicaragua |  | Hap_13, Hap_16 |
| Panama |  | Hap_18, Hap_23 |
| United States of America | Colorado | Hap_14 |
| Georgia | Hap_12 |
| Nebraska | Hap_10 |
| Nuevo Mexico | Hap_10 |
| Utah | Hap_10 |
| Wyomin | Hap_10 |
