# Supplementary material for: Molecular Tracking of The Origin of Vesicular Stomatitis Outbreaks in 2004 and 2018, Ecuador
Source: Preprints.org preprint supplement (doi:10.20944/preprints202301.0052.v1), 2023-01-04
Supplement: Supplementary file 2 [file Supplementary Table S1[1936].docx]

Supplementary Table S1. Sequences obtained from GenBank NCBI-Nucleotide. The table shows the country of origin of the sample, the serotype, the accession number, the name of the strain and the reference from where it was extracted.

| **Location** | **serotype** | **Accession number** | **Isolate** | **State/Province** | **Reference** |
| --- | --- | --- | --- | --- | --- |
| Ecuador | Indiana | EF028138.1 | Ind1/Ecuador/04(5) | Loja | (Sepúlveda et al., 2007) |
| New Jersey | EF028140.1 | VSV_NJ/Ecuador/85 | No Data |
| EF028151.1 | NJ/Ecuador/04(33) | Pichincha |
| EF028150.1 | VSV_NJ/Ecuador/04(20) | Guayas |
| EF028149.1 | VSV_NJ/Ecuador/04(19) | Pichincha |
| EF028148.1 | VSV_NJ/Ecuador/04(18) | Orellana |
| EF028147.1 | VSV_NJ/Ecuador/04(11) | Los Ríos |
| EF028146.1 | VSV_NJ/Ecuador/04(10) | Pichincha |
| EF028145.1 | VSV_NJ/Ecuador/04(9) | Cotopaxi |
| EF028144.1 | VSV_NJ/Ecuador/04(8) | Cotopaxi |
| EF028143.1 | VSV_NJ/Ecuador/04(6) | Los Ríos |
| EF028142.1 | VSV_NJ/Ecuador/04(3) | Cotopaxi |
| EF028141.1 | VSV_NJ/Ecuador/04(2) | Napo |
| Colombia | New Jersey | JX121108.1 | NJ92CLB | No Data | (Pauszek & Rodriguez, 2012) |
|  |
| KU296052.1 | COL/1/93 | (Fowler et al., 2016) |  |
| KU296053.1 | 27946/COL/1998 |  |
| KU296054.1 | 27775/COL/1998 |  |
| KU296055.1 | 27405/COL/1998 |  |
| KU296056.1 | 29453/COL/2000 |  |
| KU296057.1 | 27879/COL/1998 |  |
| Indiana | KU296058.1 | 28336/COL/1999 |  |
| KU296059.1 | 29705/COL/2001 |  |
| United States | New Jersey | JX121110.1 | NJ89GAS | Georgia | (Pauszek & Rodriguez, 2012) |  |
| JX121112.1 | NJ95COB | Colorado |  |
| EF453286.1 | NJ0405NME | Nuevo Mexico | (Fowler et al., 2016) |  |
| EF453235.1 | NJ0905WYB | Wyoming |  |
| EF453237.1 | NJ1005NEB3 | Nebraska |  |
| MT094091.1 | NJ0705UTB2 | Utah | (Palinski et al., 2020) |  |
|  |
| Indiana | MW760857.1 | Texas/18188/2019 | Texas | (Koster & Killian, 2021) |  |
| MW760862.1 | Arizona/14629/2020 | Arizona |  |
| MW760866.1 | Nebraska/18479/2020 | Nebraska |  |
| Mexico | New Jersey | EF453267.1 | NJ04CMB | Colima | (Rainwater-Lovett et al., 2007) |  |
| EF453306.1 | NJ0803CPB4 | Chiapas |  |
| KF772595.1 | NJ1208MHB1 | Michoacan | (Velazquez-Salinas et al., 2014) |  |
| KF772588.1 | NJ1208GRB | Guerrero |  |
| KF772606.1 | NJ1210VCB3 | Veracruz |  |
| KF772603.1 | NJ1208TBB | Tabasco |  |
| KF772602.1 | NJ1208OAB | Oaxaca |  |
| KF772581.1 | NJ1207CPB2 | Chiapas |  |
| KF772593.1 | NJ1208JAB5 | Jalisco |  |
| Honduras | New Jersey | JX121109.2 | NJ1184HDB | No Data | (Pauszek & Rodriguez, 2012) |  |
|  |
| M31875.1 | 12/82-HD-B | (Bilsel et al., 1990) |  |
| M31876.1 | 10/85-HD-B1 |  |
| M31871.1 | 11/84-HD-B1 |  |
| M31872.1 | 09/82-HD-B |  |
| Indiana | MK934320.1 | Hon83B/L-2-83 | (Morozov et al., 2019) |  |
|  |
| Brazil | Indiana | JF795529.1 | VSIV-386AgulhasNegrasB | Agulhas negras | (Pauszek et al., 2011) |  |
| JF795530.1 | VSIV-3 95Minas GeraisB | Minas Gerais |  |
| JF795528.1 | VSIV-3 77EspinosaB | Espinoza |  |
| JF795527.1 | VSIV-2 98Sta CatarinaB2 | Santa Catarina |  |
| JF795525.1 | VSIV-2 98ParanaE | Parana |  |
| JF795523.1 | VSIV-2 79RiberaoE | Riberao |  |
| KJ746669.1 | VSIV-3 2013SaoBento/ParaibaE | Sao Bento | (Cargnelutti et al., 2014) |  |
| KJ746668.1 | VSIV-3 2013Paulista/ParaibaB | Paulista |  |
| Panama | New Jersey | M31878.1 | 01/85-PN-B1 | No Data | (Bilsel et al., 1990) |  |
| M31879.1 | ../60-PN-B |  |
| L24975.1 | 12/83PNB | (Nichol et al., 1993) |  |
| L24964.1 | 10/83PNB |  |
| Costa Rica | New Jersey | M31874.1 | 10/82-CR-B | (Bilsel et al., 1990) |  |
|  |
| Indiana | EF028137.1 | Ind1/Costa_Rica/79 | (Sepúlveda et al., 2007) |  |
| EF028134.1 | Ind1/Costa_Rica/72 |  |
| Nicaragua | New Jersey | M31877.1 | 07/83-NC-P | (Bilsel et al., 1990) |  |
|  |
| L24971.1 | 11/83NCB | (Nichol et al., 1993) |  |
| Guatemala | M31870.1 | 10/84-GM-P | (Bilsel et al., 1990) |  |
|  |
| Argentina | Indiana | JF795524.1 | VSIV-2 86MaipuE | Buenos Aires | (Pauszek et al., 2011) |  |
| JF795521.1 | VSIV-2 63SaltoE | Buenos Aires |  |
| El Salvador | EF028136.1 | Ind1/El_Salvador/78 | No Data | (Sepúlveda et al., 2007) |  |
| EF028135.1 | Ind1/El_Salvador/71 |  |
