# Supplementary material for: Molecular Tracking of The Origin of Vesicular Stomatitis Outbreaks in 2004 and 2018, Ecuador
Source: Preprints.org preprint supplement (doi:10.20944/preprints202301.0052.v1), 2023-01-04
Supplement: Supplementary file 3 [file Supplementary Table S2[1939].docx]

Supplementary Table S2. ID of the virus samples from the 2018 outbreak, the GenBank accession number, geographic origin in Ecuador, month of isolation and serotype.

| **Sample ID** | **Accession number** | **Seroype** | **Isolation Month** | **Province** | **Canton** | **Parish** |
| --- | --- | --- | --- | --- | --- | --- |
| 6430 | ON567144 | New Jersey | October | Carchi | Mira | Juan Montalvo |
| 9084 | ON567167 | New Jersey | November | Carchi | Montufar | La Paz |
| 9095 | ON567169 | New Jersey | November | Carchi | Espejo | San Isidro |
| 6302 | ON567142 | New Jersey | October | Carchi | Mira | Juan Montalvo |
| 3347 | ON567121 | New Jersey | July | Cotopaxi | Pujilí | Pujilí |
| 5709 | ON567140 | New Jersey | September | Cotopaxi | Sigchos | Palo Quemado |
| 4918 | ON567127 | New Jersey | August | Esmeraldas | Quinindé | Malimpia |
| 1204 | ON567116 | New Jersey | March | Guayas | Balao | Balao |
| 1499 | ON567117 | New Jersey | April | Guayas | Balao | Balao |
| 6568 | ON567146 | New Jersey | October | Imbabura | Antonio Ante | Imbaya |
| 6338 | ON567143 | New Jersey | October | Imbabura | Ibarra | Salinas |
| 6592 | ON567148 | New Jersey | October | Imbabura | Urcuquí | Tumbabiro |
| 6567 | ON567145 | New Jersey | October | Imbabura | Antonio Ante | Imbaya |
| 8785 | ON567156 | New Jersey | October | Imbabura | Urcuquí | San Blas |
| 8765 | ON567154 | New Jersey | October | Imbabura | Ibarra | Lita |
| 8908 | ON567162 | New Jersey | October | Imbabura | Pimampiro | San Francisco de Sigsipamba |
| 8825 | ON567160 | New Jersey | October | Imbabura | Urcuquí | San Blas |
| 8764 | ON567153 | New Jersey | October | Imbabura | Pimampiro | San Francisco de Sigsipamba |
| 8774 | ON567155 | New Jersey | October | Imbabura | Pimampiro | Chuga |
| 8798 | ON567157 | New Jersey | October | Imbabura | Cotacachi | Sagrario |
| 8881 | ON567161 | New Jersey | October | Imbabura | Pimampiro | Pimampiro |
| 9132 | ON567170 | New Jersey | November | Imbabura | Urcuquí | San Blas |
| 8992 | ON567165 | New Jersey | November | Imbabura | Urcuquí | Buenos Aires |
| 8921 | ON567163 | New Jersey | October | Imbabura | Cotacachi | Imantag |
| 6597 | ON567149 | New Jersey | October | Imbabura | Urcuquí | Pablo Salinas |
| 2623 | ON567119 | New Jersey | July | Los Ríos | Montalvo | Montalvo |
| 8789 | ON567158 | New Jersey | October | Morona Santiago | Morona | Sevilla Don Bosco |
| 111 | ON567115 | New Jersey | January | Napo | Tena | Tena |
| 8812 | ON567159 | New Jersey | October | Napo | Tena | Puerto Napo |
| 8994 | ON567166 | New Jersey | November | Napo | Tena | Tena |
| 9425 | ON567175 | New Jersey | November | Napo | Archidona | Cotundo |
| 9073 | ON567168 | New Jersey | November | Napo | Carlos Julio Arosemena Tola | Carlos Julio Arosemena Tola |
| 9422 | ON567174 | New Jersey | November | Orellana | Francisco De Orellana | Guayusa |
| 9678 | ON567177 | New Jersey | December | Orellana | Francisco De Orellana | Nuevo Paraíso |
| 8922 | ON567164 | New Jersey | October | Orellana | Francisco De Orellana | No Informa |
| 9814 | ON567113 | Indiana | December | Orellana | Loreto | San José De Payamino |
| 6601 | ON567150 | New Jersey | October | Pastaza | Pastaza | Simón Bolívar |
| 6602 | ON567151 | New Jersey | October | Pastaza | Pastaza | Simón Bolívar |
| 1785 | ON567111 | Indiana | April | Pichincha | Pedro Vicente Maldonado | Pedro Vicente Maldonado |
| 4714 | ON567125 | New Jersey | August | Pichincha | Puerto Quito | Puerto Quito |
| 5417 | ON567138 | New Jersey | September | Pichincha | Quito | Lloa |
| 5156 | ON567136 | New Jersey | August | Pichincha | Pedro Vicente Maldonado | No Informa |
| 5710 | ON567141 | New Jersey | September | Pichincha | Pedro Vicente Maldonado | Pedro Vicente Maldonado |
| 9421 | ON567173 | New Jersey | November | Pichincha | Cayambe | Cusubamba |
| 2482 | ON567112 | Indiana | June | Santo Domingo de los Tsáchilas | Santo Domingo | Valle Hermoso |
| 3277 | ON567120 | New Jersey | July | Santo Domingo de los Tsáchilas | Santo Domingo | Santa María Del Toachi |
| 4222 | ON567122 | New Jersey | August | Santo Domingo de los Tsáchilas | Santo Domingo | El Esfuerzo |
| 4945 | ON567129 | New Jersey | August | Santo Domingo de los Tsáchilas | Santo Domingo | Alluriquín |
| 4393 | ON567123 | New Jersey | August | Santo Domingo de los Tsáchilas | Santo Domingo | Las Mercedes |
| 4498 | ON567124 | New Jersey | August | Santo Domingo de los Tsáchilas | Santo Domingo | Río Verde |
| 5128 | ON567134 | New Jersey | August | Santo Domingo de los Tsáchilas | Santo Domingo | Las Mercedes |
| 5126 | ON567133 | New Jersey | August | Santo Domingo de los Tsáchilas | Santo Domingo | Las Mercedes |
| 5122 | ON567130 | New Jersey | August | Santo Domingo de los Tsáchilas | Santo Domingo | Las Mercedes |
| 5124 | ON567131 | New Jersey | August | Santo Domingo de los Tsáchilas | Santo Domingo | Las Mercedes |
| 5129 | ON567135 | New Jersey | August | Santo Domingo de los Tsáchilas | La Concordia | La Concordia |
| 9639 | ON567176 | New Jersey | December | Santo Domingo de los Tsáchilas | Santo Domingo | Luz De América |
| 4870 | ON567126 | New Jersey | August | Santo Domingo de los Tsáchilas | Santo Domingo | Alluriquín |
| 5284 | ON567137 | New Jersey | August | Santo Domingo de los Tsáchilas | Santo Domingo | Puerto Limón |
| 5125 | ON567132 | New Jersey | August | Santo Domingo de los Tsáchilas | Santo Domingo | Las Mercedes |
| 5639 | ON567139 | New Jersey | September | Santo Domingo de los Tsáchilas | Santo Domingo | Alluriquín |
| 4942 | ON567128 | New Jersey | August | Santo Domingo de los Tsáchilas | Santo Domingo | Las Mercedes |
| 952 | ON567114 | New Jersey - Indiana | February | Sucumbíos | Cascales | Dorado Cascales |
| 1992 | ON567118 | New Jersey | May | Zamora Chinchipe | Yantzaza | Yantzaza |
| 9263 | ON567171 | New Jersey | November | Zamora Chinchipe | Chinchipe | Zumba |
| 9356 | ON567172 | New Jersey - Indiana | November | Zamora Chinchipe | El Pangui | El Pangui |
