# Supplementary material for: Molecular Tracking of The Origin of Vesicular Stomatitis Outbreaks in 2004 and 2018, Ecuador
Source: Preprints.org preprint supplement (doi:10.20944/preprints202301.0052.v1), 2023-01-04
Supplement: Supplementary file 4 [file Supplementary figure 1[1937].docx]

**
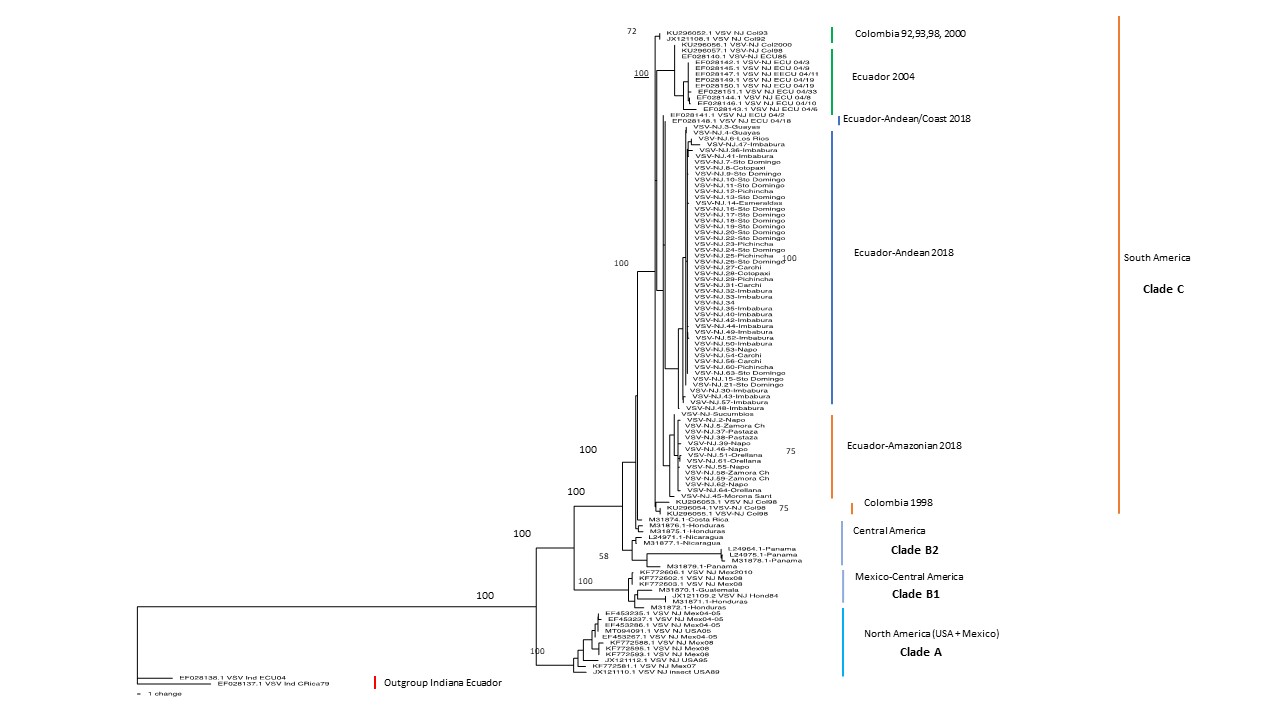
**

Supplementary figure 1. Shown is a phylogram, a scaled phylogenetic tree in which the branch lengths are proportional to the amount of evolutionary divergence, of the Vesicular stomatitis VSNJV isolates in Ecuador in 2018 and 2014
