# Supplementary material for: Molecular Tracking of The Origin of Vesicular Stomatitis Outbreaks in 2004 and 2018, Ecuador
Source: Preprints.org preprint supplement (doi:10.20944/preprints202301.0052.v1), 2023-01-04
Supplement: Supplementary file 5 [file Supplementary figure 2[1938].docx]

Supplementary figure 2. The VSIV Phylogram with GenBank strains and isolates from 2004 and 2018 from Ecuador, shows the mutational changes in a length bar.
